# Supplementary material for: Facile and rapid DNA extraction and purification from food matrices using IFAST (immiscible filtration assisted by surface tension)
Source: Royal Society of Chemistry journal article supplement (doi:10.1039/c2an35506j), 2012-01-01
Supplement: c2an35506j.pdf [file c2an35506j.pdf]

### Supplementary Data

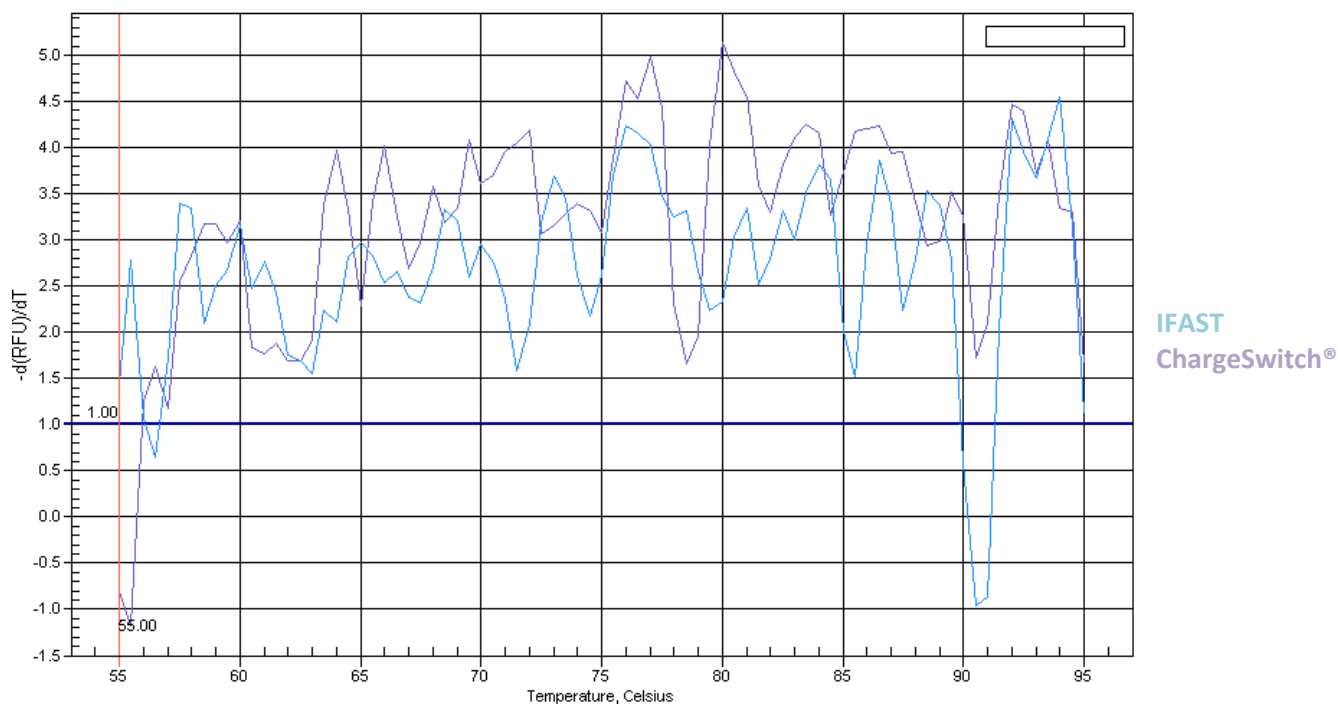

Figure S1: Melt curves of DNA purification from culture broth without *C. botulinum* cells using the IFAST and ChargeSwitch® methods. No amplification was seen.

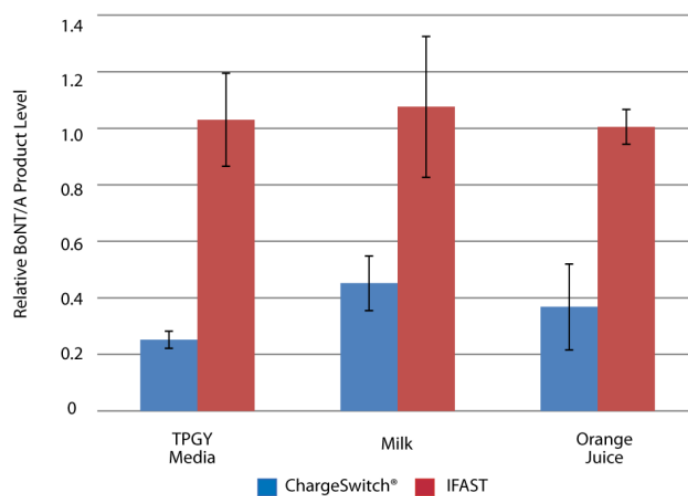

Figure S2: Relative *bont/A* product level was determined by the following equation.  
 $Relative\ Product = 2^{C_t\ IFAST\ average - C_t\ IFAST\ or\ ChargeSwitch®}$  The relative products were averaged and graphed. On average IFAST produces  $3.07 \pm 0.52$  more *bont/A* product.

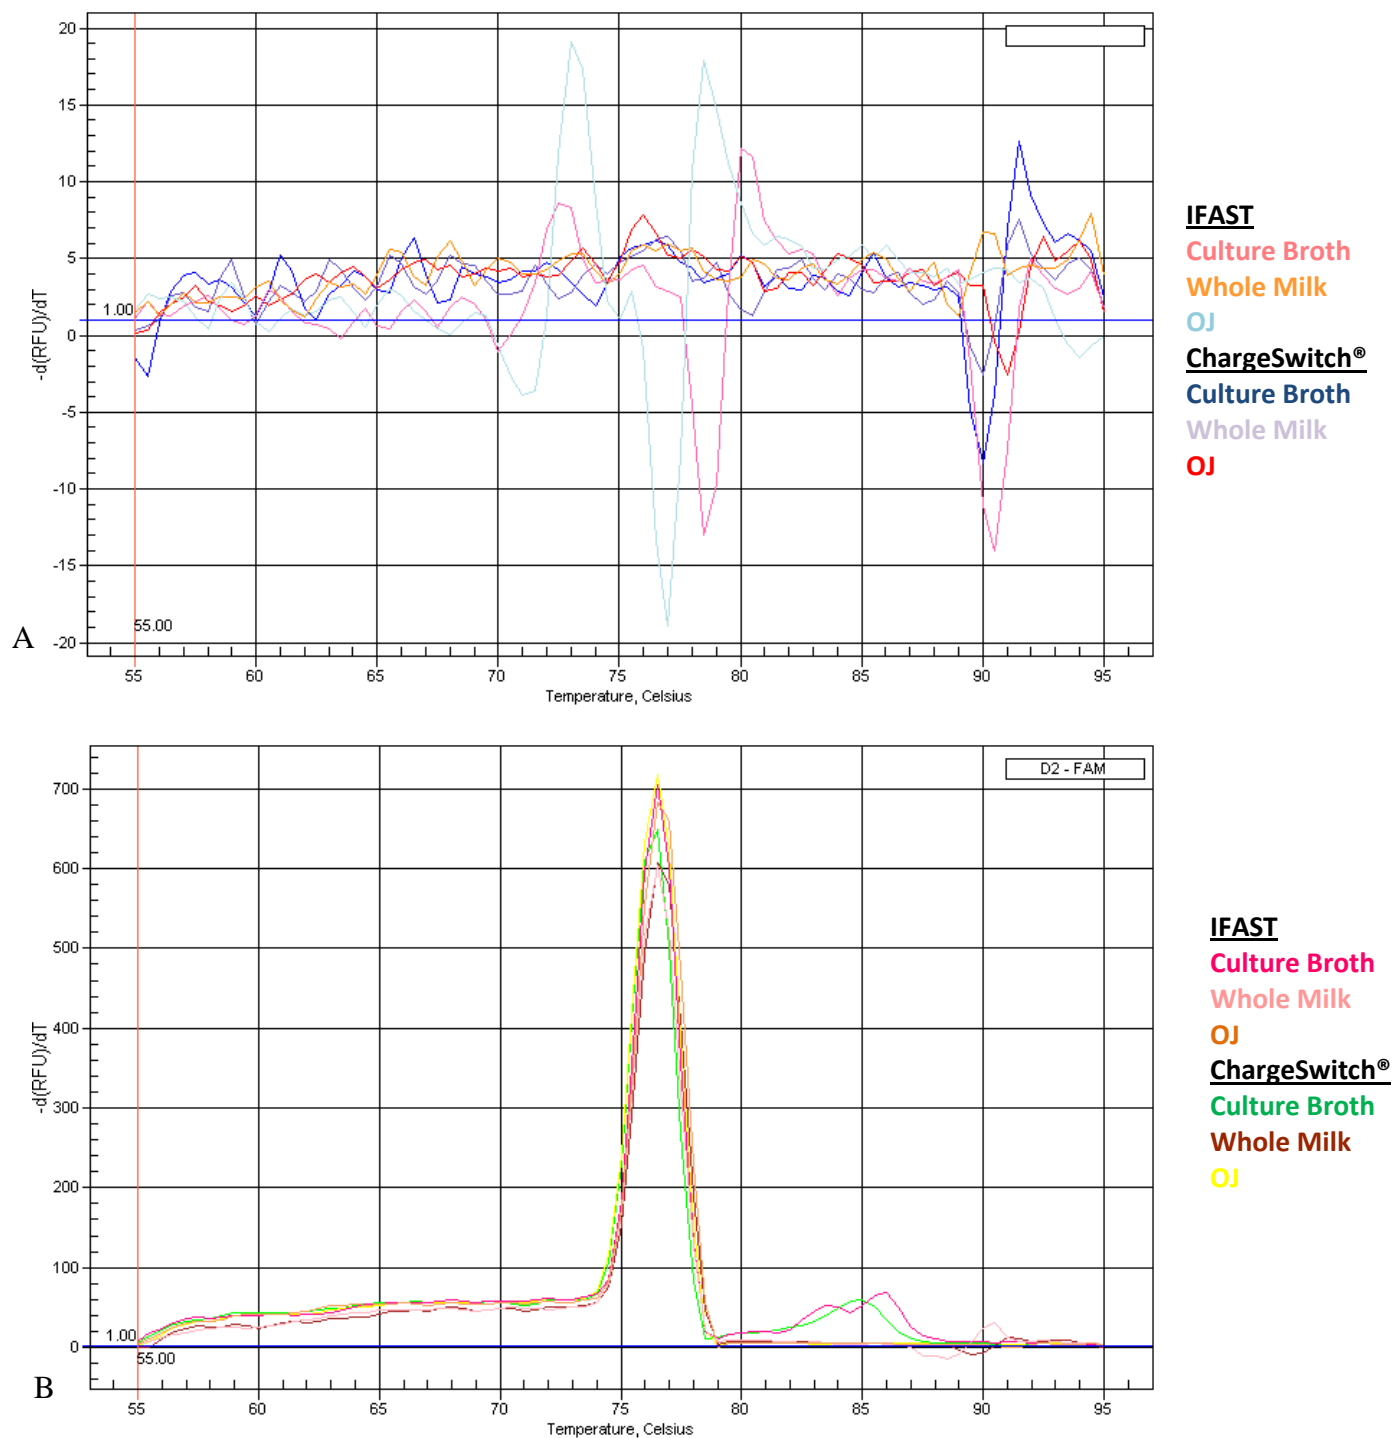

Figure S3: A. Melt curves of DNA purification from culture broth, whole milk and orange juice without *C. botulinum* cells using the IFAST and ChargeSwitch® methods. No amplification was seen. B. Melt curves of DNA purification from culture broth, whole milk and orange juice spiked

with  $10^8$  *C. botulinum* cells/mL using the IFAST and ChargeSwitch® methods. Amplification was seen.
